# Supplementary material for: Hierarchically porous TiO2 monolith prepared using a cellulose monolith as a template
Source: Royal Society of Chemistry journal article supplement (doi:10.1039/d1qm00220a), 2021-01-01
Supplement: d1qm00220a1.pdf [file d1qm00220a1.pdf]

## **Hierarchical TiO<sub>2</sub> Monolith Prepared Using Cellulose Monolith as Template**

Yanting Lyu, Taka-Aki Asoh\*, Hiroshi Uyama\*

Department of Applied Chemistry, Graduate School of Engineering, Osaka

University, 2-1 Yamadaoka, Suita, Osaka 565-0871, Japan

E-mail: asoh@chem.eng.osaka-u.ac.jp, uyama@chem.eng.osaka-u.ac.jp

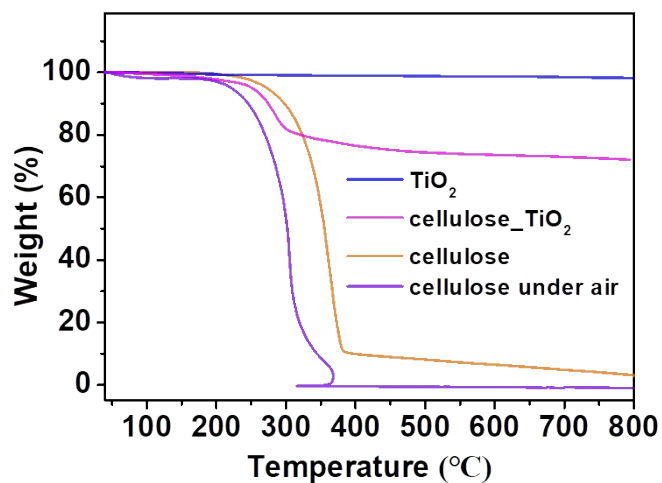

**Fig. S1** TGA measurements of cellulose, cellulose\_TiO<sub>2</sub>, and TiO<sub>2</sub> monoliths under nitrogen and cellulose monolith under air.

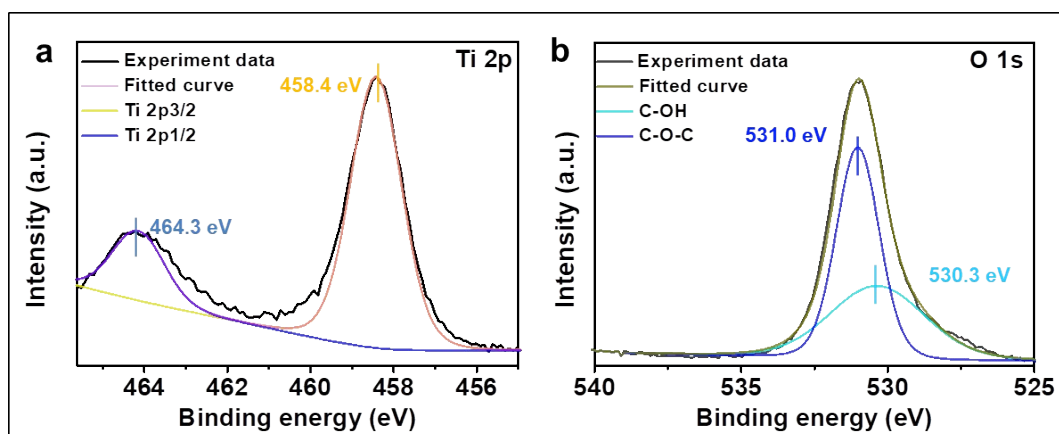

**Fig. S2** High-resolution XPS spectra of (a) Ti 2p of cellulose 80\_TiO<sub>2</sub> 40, (b) O 1s of cellulose 80 monolith.

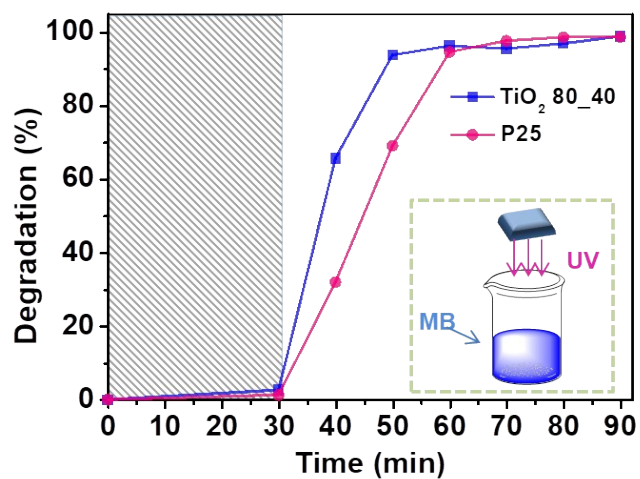

**Fig. S3** Photocatalytic activity TiO<sub>2</sub> 80\_40 powder and P25 for MB solution. Shaded areas indicate periods without illumination (inset is a schematic representation of the experimental setup used for the photocatalytic test).

**Table S1.** Details for preparation of TiO<sub>2</sub> monoliths with different content of TTIP.

| Sample                           | TTIP (mL) | Isopropyl alcohol (mL) | H <sub>2</sub> O (mL) |
|----------------------------------|-----------|------------------------|-----------------------|
| TiO <sub>2</sub> x <sub>30</sub> | 4.5       | 0.95                   | 9.5                   |
| TiO <sub>2</sub> x <sub>40</sub> | 6.0       | 0.82                   | 8.2                   |
| TiO <sub>2</sub> x <sub>50</sub> | 7.5       | 0.68                   | 6.8                   |
| TiO <sub>2</sub> x <sub>60</sub> | 9.0       | 0.55                   | 5.5                   |
